# Supplementary material for: Single-cell atlas unveils cellular heterogeneity and novel markers in human neonatal and adult intervertebral discs
Source: PubMed Central journal article supplement — iScience. 2022 Jun 2;25(7):104504. doi: 10.1016/j.isci.2022.104504 (PMC9213722; doi:10.1016/j.isci.2022.104504), 2022-06-02
Supplement: mmc1.pdf [file mmc1.pdf]

iScience, Volume 25

## **Supplemental information**

### **Single-cell atlas unveils cellular heterogeneity and novel markers in human neonatal and adult intervertebral discs**

**Wensen Jiang, Juliane D. Glaeser, Khosrowdad Salehi, Giselle Kaneda, Pranav Mathkar, Anton Wagner, Ritchie Ho, and Dmitriy Sheyn**



# Supplemental Information. Figure S1

a

NC1 (Neonatal IVD)

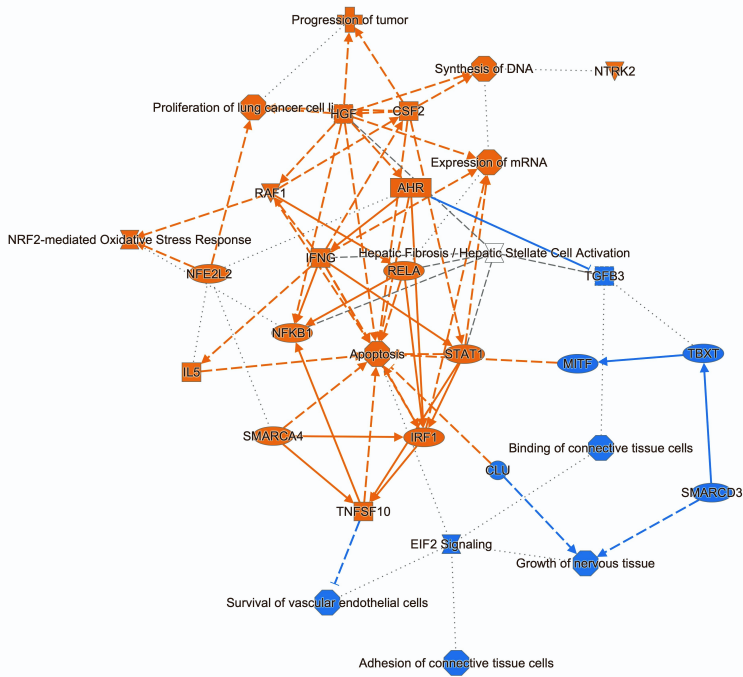

b

NC2 (Neonatal IVD)

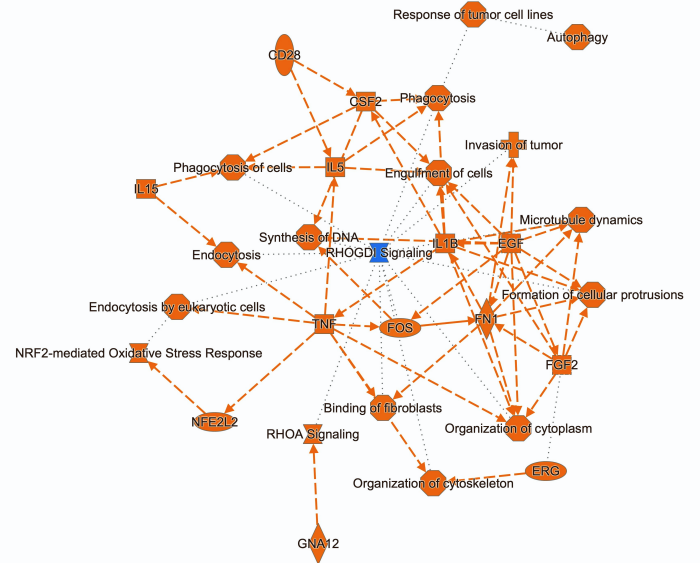

c

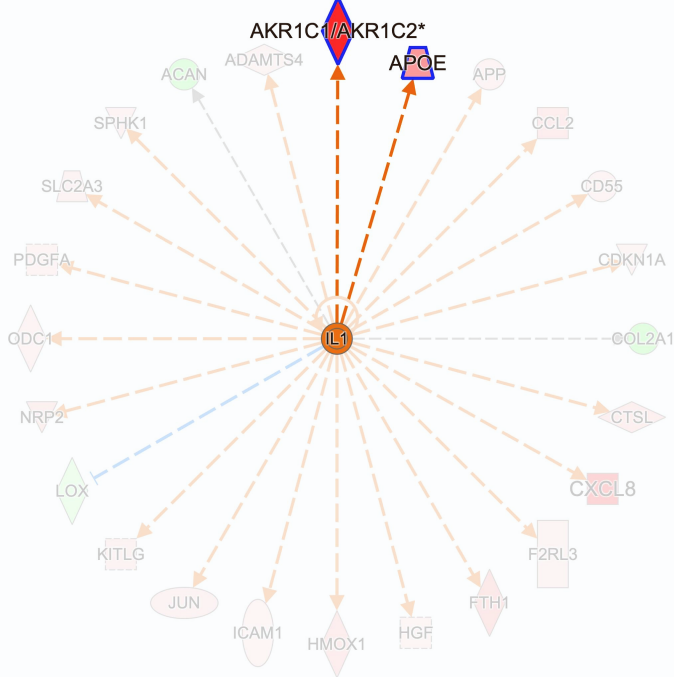

d

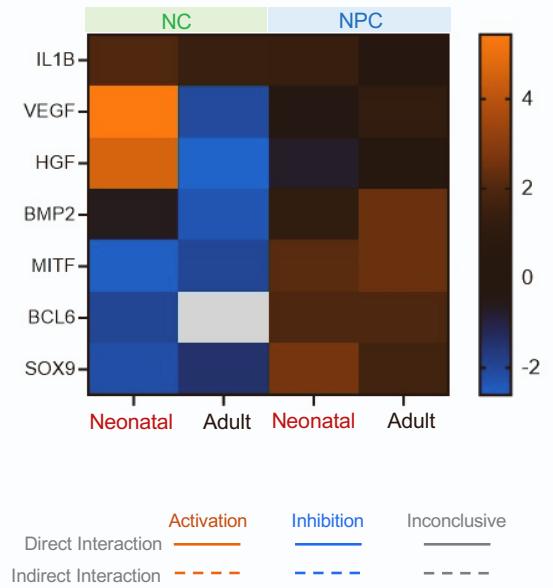

**Figure S1. Additional Pathway and Network Analyses for NC Sub-Populations and Key Regulators in NC Populations Compared with NPC Populations in Neonatal and Adult IVD, Related to Figure 2.** Pathway and network summary for a) NC1 and b) NC2 sub-populations in neonatal IVD. c) The IL1-regulated network involving *APOE* and *AKR1C1/AKR1C2*. d) Heatmap showing top regulators for NCs and NPCs in neonatal and adult IVD. Orange indicates activation, blue deactivation, and grey shows data that were either not detected or did not pass the filtering.

### Unfolded protein response pathway

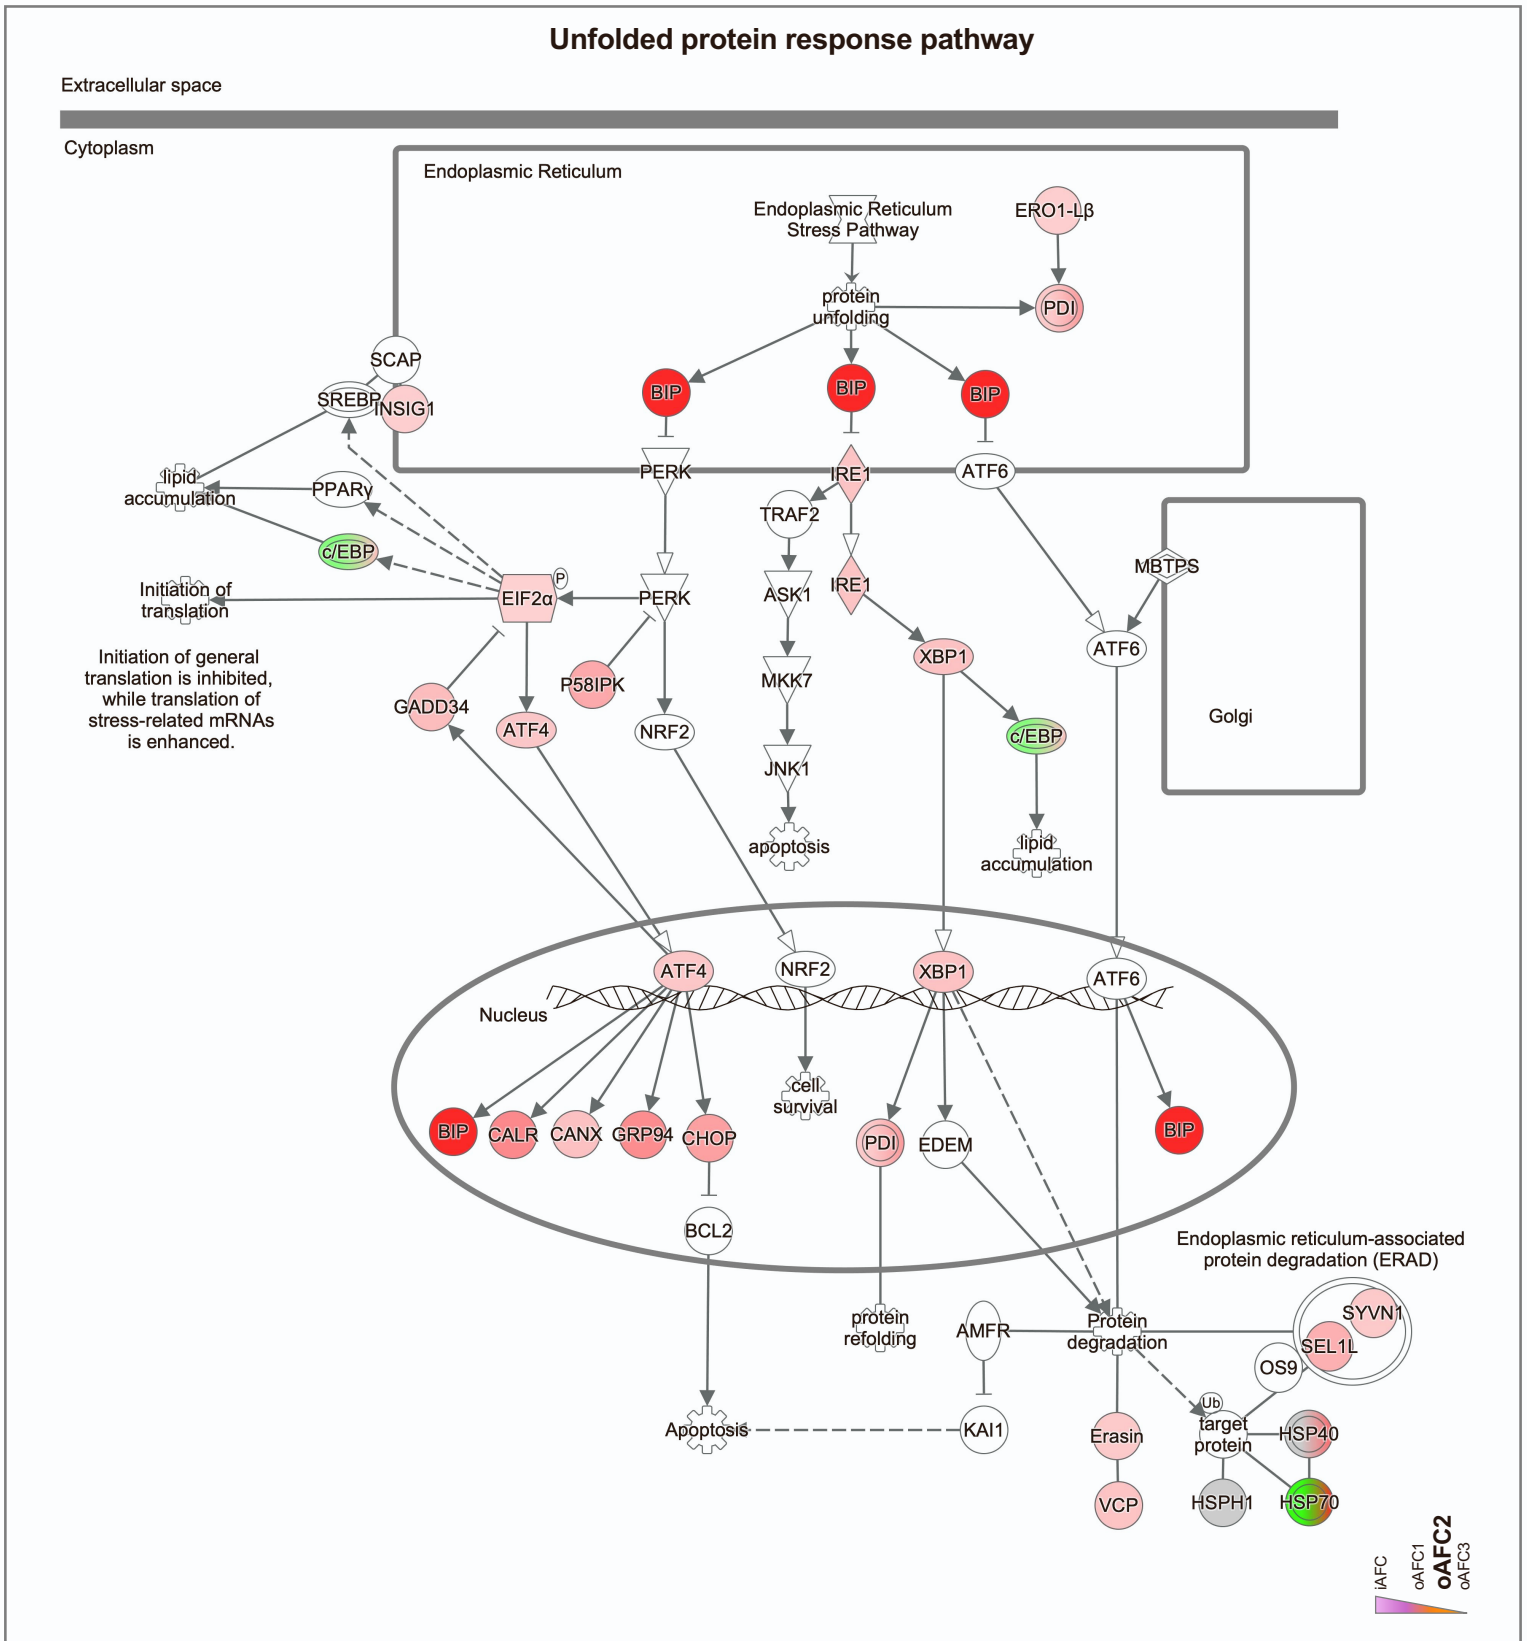

Figure S2. Gene Expression Projected on the Spatially Dependent Unfolded Protein Response Signaling Pathway for oAFC2 Sub-Populations in Neonatal IVD. Related to Figure 5.

Supplemental Information. Figure S3

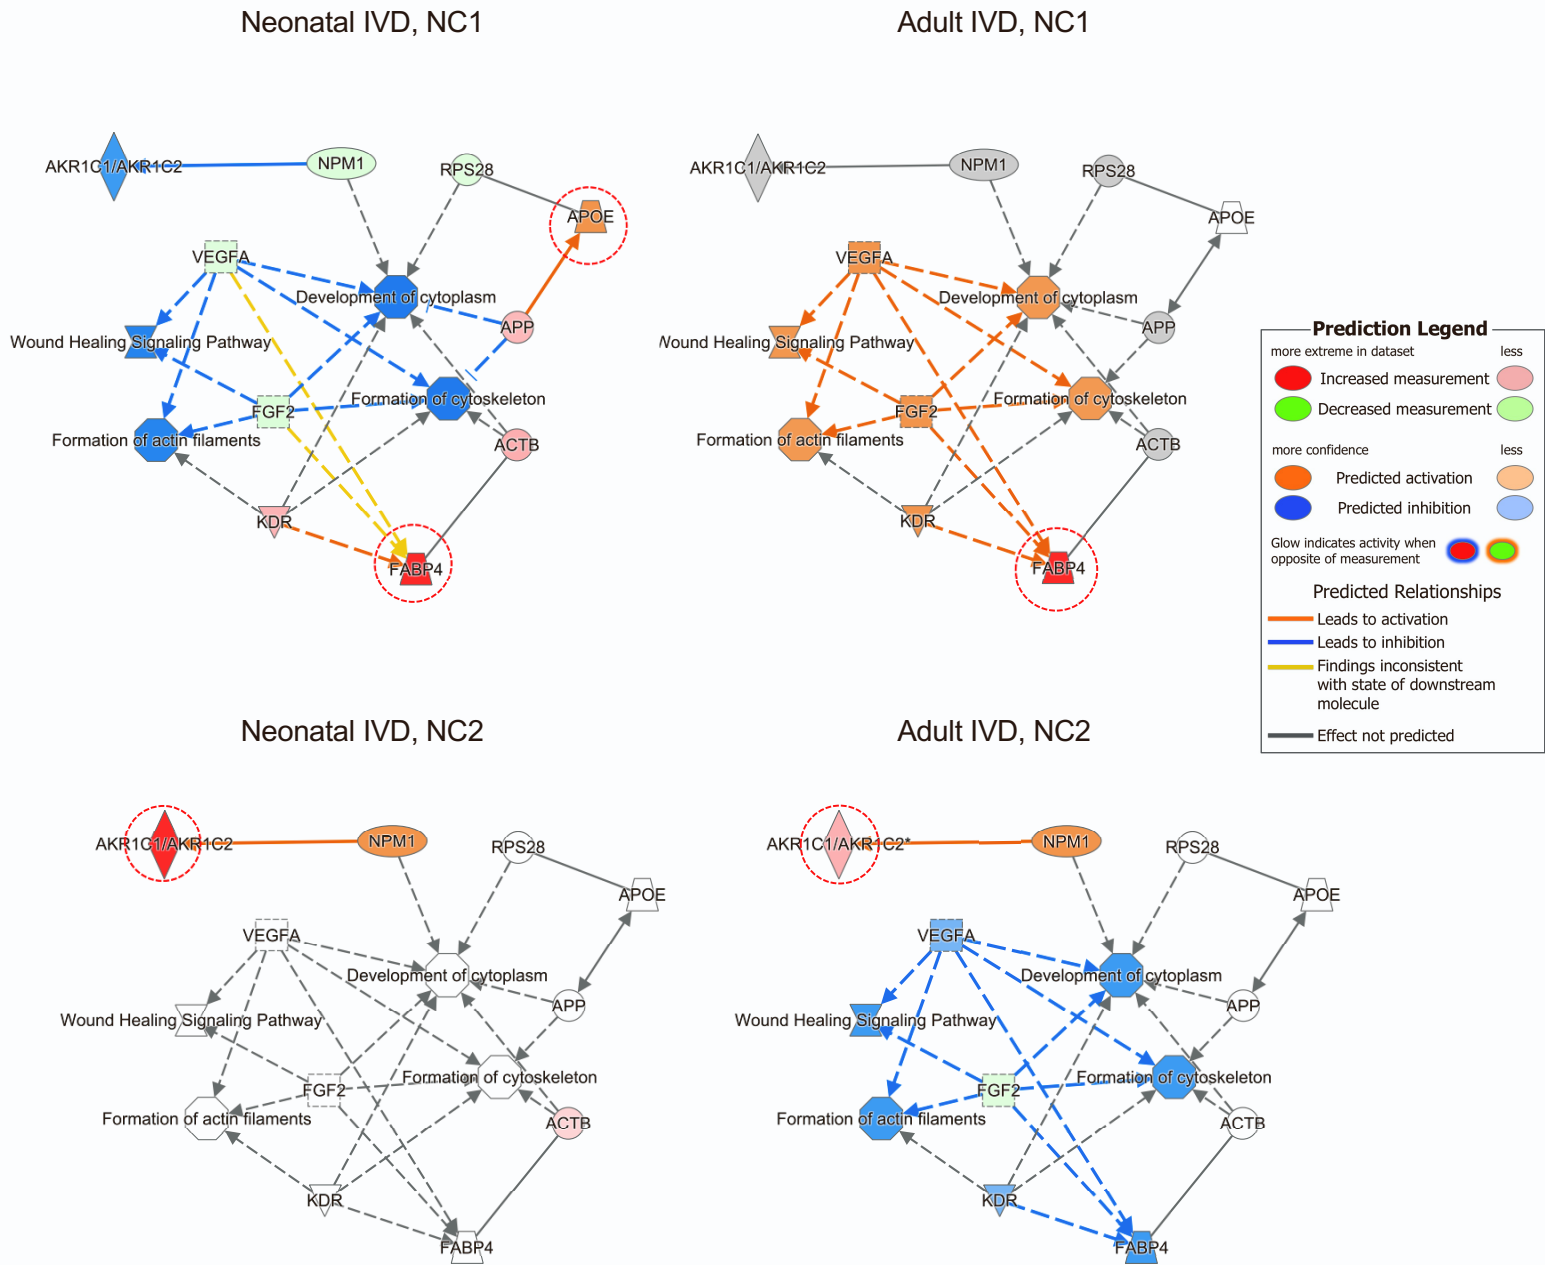

Figure S3. Regulatory networks showing novel NC markers (FABP4, APOE, AKR1C1) regulate NPC functions. Related to Figure 3.

Supplemental Information. Figure S4

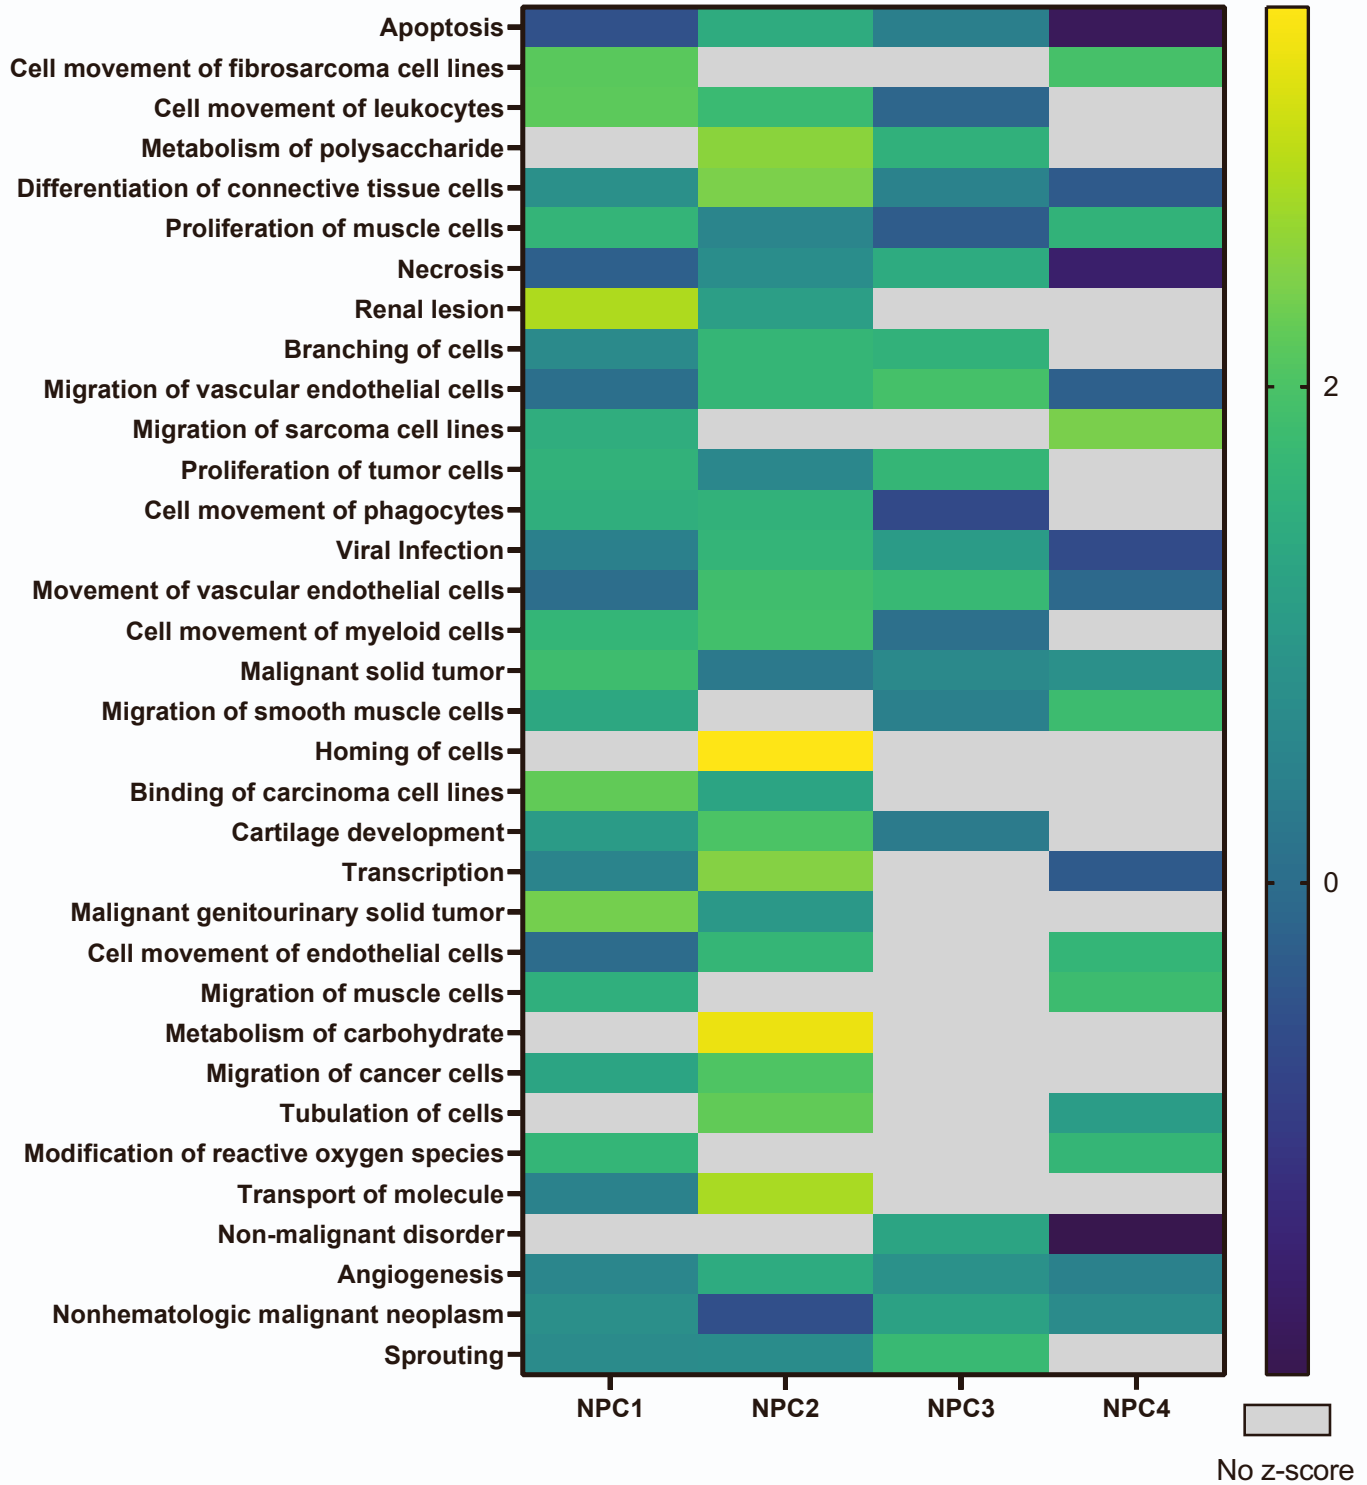

Figure S4. Distinct Enriched Functions for Four Different NPC Sub-Populations. Related to Figure 4.

Supplemental Information. Figure S5

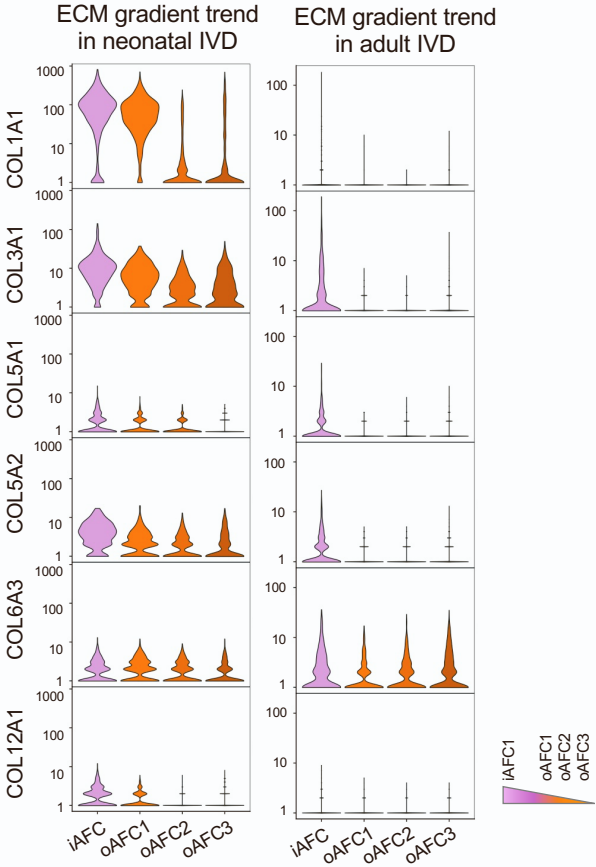

Figure S5. Comparison of the Spatially Dependent Trend of Expression Levels for Collagen-Relevant Genes in Neonatal and Adult IVD. Related to Figure 5.

## Supplemental Information. Figure S6

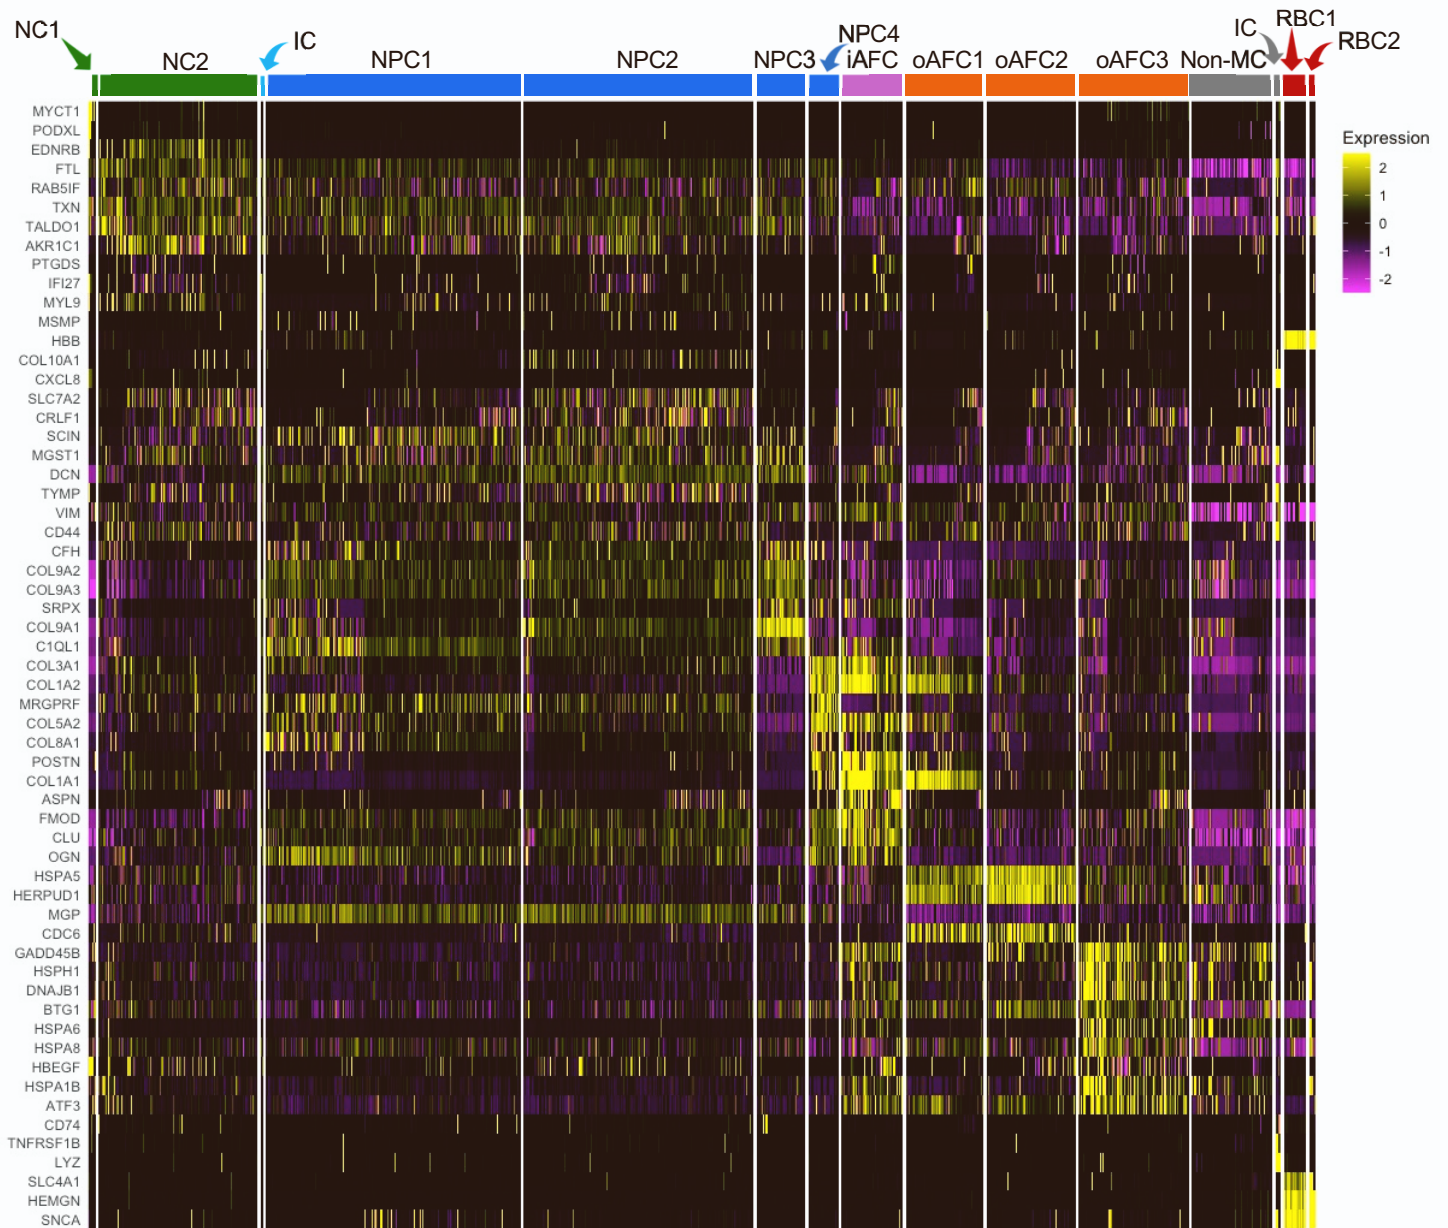

**Figure S6. Heatmap Showing the Transcriptomes of Top Differentially Expressed Genes for All Sub-Populations Identified in Human IVD.** Data include both neonatal and adult IVD. Related to 6



# Supplemental Information. Figure S7

Sample 1  
Neonatal IVD

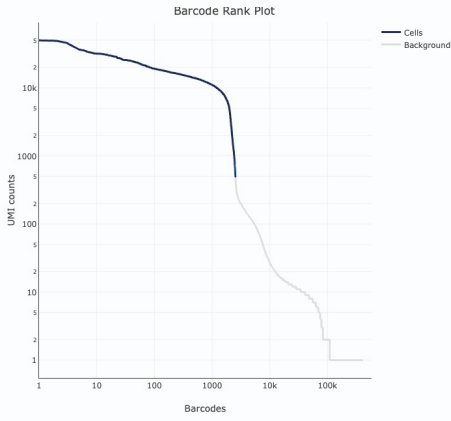

Sample 2  
Neonatal IVD

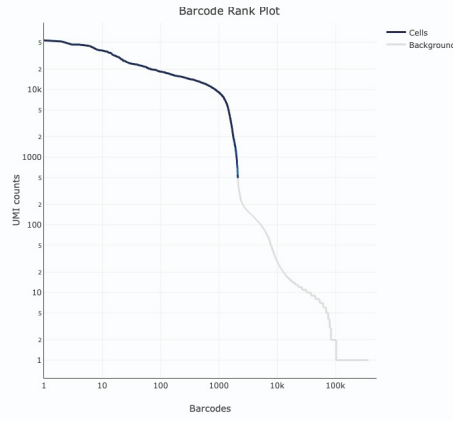

Sample 3  
Neonatal IVD

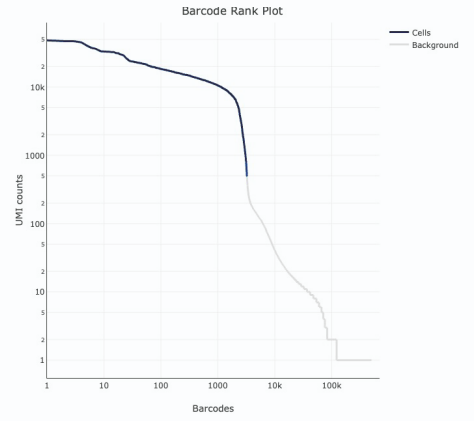

Sample 4  
Adult IVD

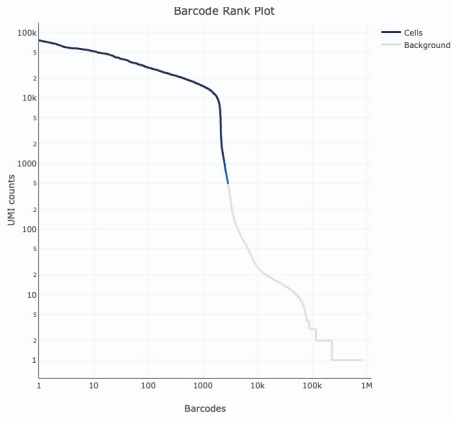

Sample 5  
Adult IVD

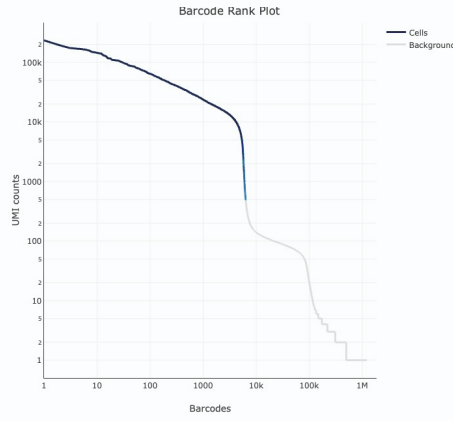

Sample 6  
Adult IVD

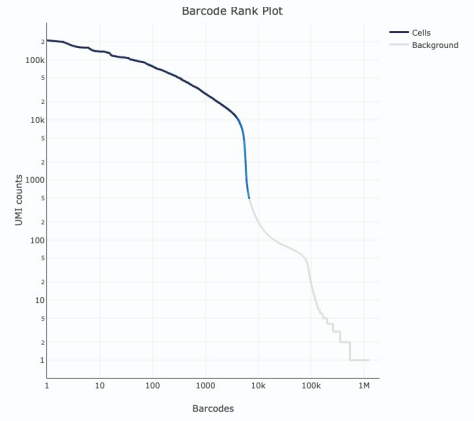

**Figure S7. Barcode Rank Plot Showing the Filtered UMI Distribution over Barcodes. Related to STAR Methods.**

**Supplemental Information. Table S1**

**Table S1. The basic information of samples, human subjects, and single cell RNA sequencing.**  
(Raw data is available at Gene Expression Omnibus, the series accession number is GSE189916)

| Samples                        | 1                | 2                | 3                | 4                       | 5                           | 6                       |
|--------------------------------|------------------|------------------|------------------|-------------------------|-----------------------------|-------------------------|
| Human Subjects                 | Neonatal         | Neonatal         | Neonatal         | Cedars-Sinai<br>Biobank | Cedars-<br>Sinai<br>Biobank | Cedars-Sinai<br>Biobank |
|                                | NDRI,<br>ND18842 | NDRI,<br>ND18842 | NDRI,<br>ND18842 | (L2-L3)                 | (L1-L4)                     | (L2-L5)                 |
|                                | (L1-L5)          | (L1-L5)          | (L1-L5)          |                         |                             |                         |
| Ages                           | 0                | 0                | 0                | 76                      | 57                          | 66                      |
| Back pain history?             | No               | No               | No               | No                      | No                          | No                      |
| Group Assignment               | Neonatal<br>IVD  | Neonatal IVD     | Neonatal IVD     | Adult IVD               | Adult IVD                   | Adult IVD               |
| Number of cells<br>sequenced   | 2501             | 2063             | 3210             | 2722                    | 5990                        | 5523                    |
| Mean reads                     | 132317           | 166578           | 95322            | 73328                   | 97823                       | 114588                  |
| per cell                       |                  |                  |                  |                         |                             |                         |
| Median genes per cell          | 2601             | 2519             | 2376             | 3231                    | 3592                        | 3618                    |
| Median UMI counts per<br>cells | 9727             | 8836             | 8173             | 13124                   | 13648                       | 14672                   |
